# Supplementary material
Source: publisher figshare collection journal article supplement (https://gsapubs.figshare.com/ndownloader/files/23319572)
Supplement: Supplementary file 1 [file 23319572]

## **GSA Data Repository Item 2020124**

Shellnutt, J.G., et al., 2020, Magmatic duration of the Emeishan large igneous province: Insight from northern Vietnam: *Geology*, v. 48, <https://doi.org/10.1130/G47076.1>

## **METHODS**

Zircon crystals were separated using magnetic and heavy liquid mineral-separation techniques. Several clear, euhedral zircons for each sample were isolated, and pre-treated according to the chemical-abrasion method of Mattinson (2005). Selected zircons were cleaned with concentrated distilled HNO<sub>3</sub> and HCl, and were sufficiently small that chemical-separation methods were not employed. For ID-TIMS analysis, the samples were spiked with an in-house <sup>205</sup>Pb-<sup>235</sup>U tracer solution.

Dissolution and equilibration of spiked single crystals was by vapour transfer of HF, using Teflon microcapsules in a Parr pressure vessel placed in a 220°C oven for six days. The resulting residue was re-dissolved in HCl and H<sub>3</sub>PO<sub>4</sub> and placed on an outgassed, zone-refined rhenium single filament with 5 µL of silicic acid gel. U–Pb isotope analyses were carried out at the John de Laeter Centre for Isotope Research at Curtin University using a Thermo Triton mass spectrometer, in peak-jumping mode using a secondary electron multiplier. Uranium was measured as an oxide (UO<sub>2</sub>). Fractionation and deadtime were monitored using SRM981 and SRM982. Mass fractionation was  $0.03 \pm 0.06$  ‰/amu. Data were reduced and plotted using the software packages Tripoli (from CIRDLES.org) and Isoplot 4.15 (Ludwig, 2011). All uncertainties are reported at 2σ, and do not include tracer-calibration uncertainties. Decay constants are from Jaffey et al. (1971)

and the weights of the zircon crystals were calculated from measurements of photomicrographs and estimates of the third dimension.

## SUPPLEMENTARY FIGURES

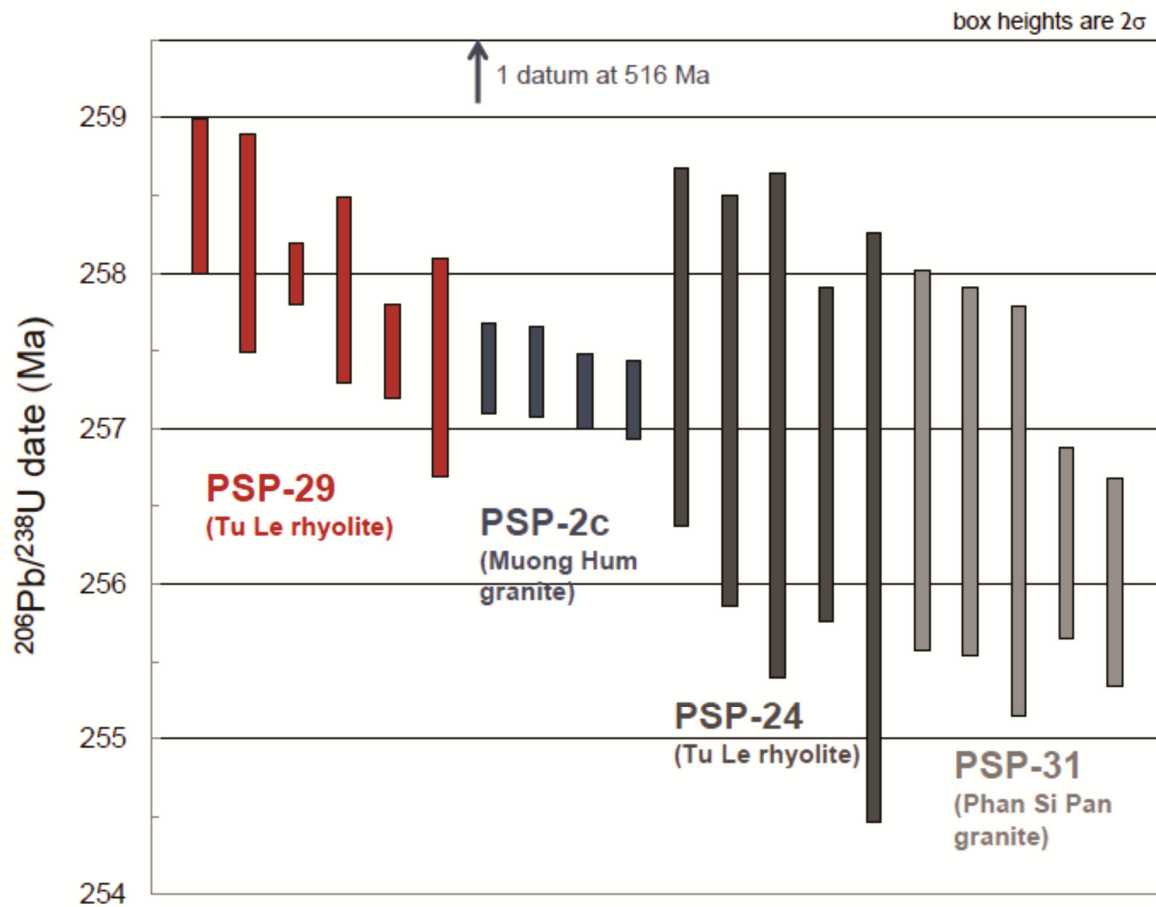

**Figure DR1. Ranked age plot for single zircon U/Pb analyses for PSP-29 (Tu Le rhyolite), PSP-2c (Muong Hum granite), PSP-24 (Tu Le rhyolite), and PSP-31 (Phan Si Pan granite). There is one inherited zircon ( $515.6 \pm 0.5$  Ma) in sample PSP-2c.**

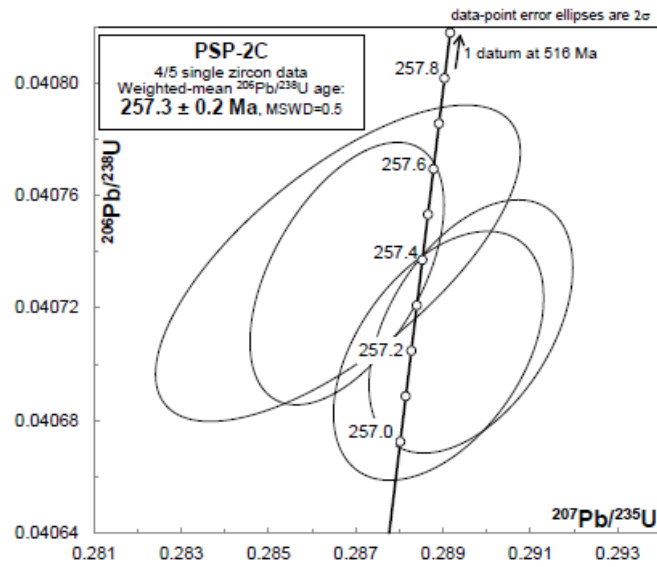

**Figure DR2.** Concordia plot of zircon ages from sample PSP-2c (Muong Hum granite).

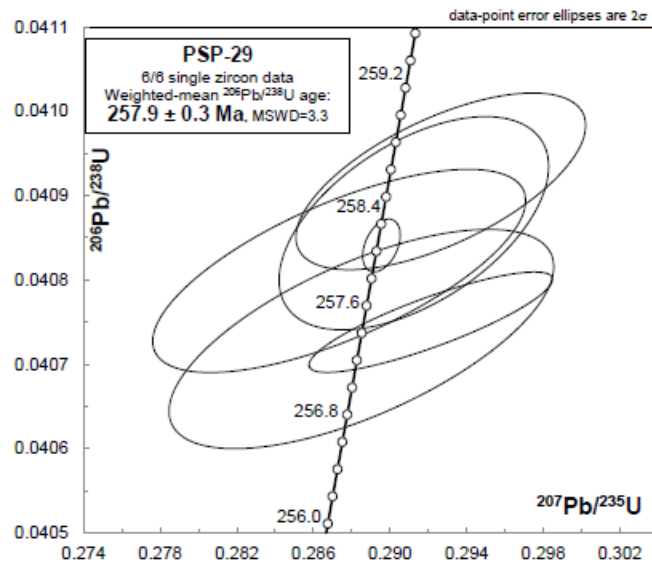

**Figure DR3.** Concordia plot of zircon ages from sample PSP-29 (Tu Le rhyolite).

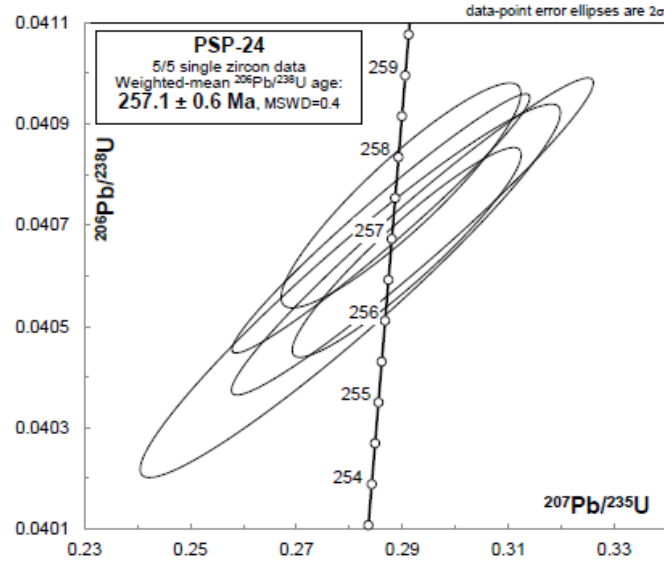

**Figure DR4. Concordia plot of zircon ages from sample PSP-24 (Tu Le rhyolite).**

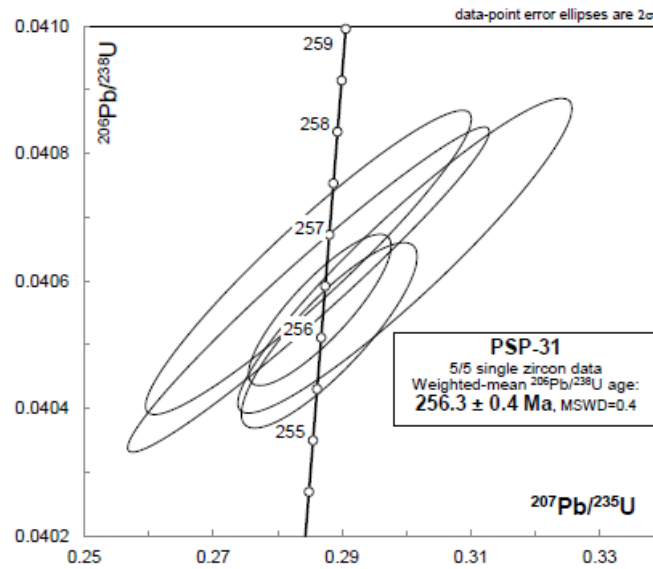

**Figure DR5. Concordia plot of zircon ages from sample PSP-31 (Phan Si Pan granite).**

## REFERENCES CITED

Jaffrey, A.H., Flynn, K.F., Glendenin, L.E., Bentley, W.C., and Essling, A.M., 1971, Precision measurement of half-lives and specific activities of  $^{235}\text{U}$  and  $^{238}\text{U}$ : Physical Review, v. C4, p. 1889–1906.

Ludwig, K.R., 2011. Isoplot v. 4.15: a geochronological toolkit for Microsoft Excel. Berkeley Geochronology Center Special Publication, v. 4, 70 pp.

Mattison, J.M., 2005, Zircon U-Pb chemical (“CA-TIMS”) method: combined annealing and multi-step partial dissolution analysis for improved precision and accuracy of zircon ages: Chemical Geology, v. 220, p. 47-66.

# GSA Data Repository Item 2020124

Shellnutt, J.G., et al., 2020, Magmatic duration of the Emeishan large igneous province: Insight from northern Vietnam: *Geology*, v. 48, <https://doi.org/10.1130/G47076.1>

TABLE DR1. RESULTS OF ZIRCON CA-ID TIMS DATING OF ROCKS FROM THE TU LE-PHAN SI PAN REGION, NORTHERN VIETNAM.

| Fraction                                                                 | wt.<br>(μg) | U<br>(ppm) | Pb <sub>c</sub><br>(pg) | mol%<br>Pb* | Th<br>U | <sup>206</sup> Pb<br><sup>204</sup> Pb | <sup>207</sup> Pb<br><sup>206</sup> Pb | ±<br>(%) | <sup>207</sup> Pb<br><sup>235</sup> U | ±<br>(%) | <sup>206</sup> Pb<br><sup>238</sup> U | ±<br>(%) | ρ   | <sup>206</sup> Pb/ <sup>238</sup> U<br>Age (Ma) | ±<br>(Ma) | <sup>207</sup> Pb/ <sup>206</sup> Pb<br>Age (Ma) | ±<br>(Ma) |
|--------------------------------------------------------------------------|-------------|------------|-------------------------|-------------|---------|----------------------------------------|----------------------------------------|----------|---------------------------------------|----------|---------------------------------------|----------|-----|-------------------------------------------------|-----------|--------------------------------------------------|-----------|
| <b>PSP-2c: 1 zircon per fraction (22° 21' 37.5" N, 103° 46' 40.8" E)</b> |             |            |                         |             |         |                                        |                                        |          |                                       |          |                                       |          |     |                                                 |           |                                                  |           |
| 1                                                                        | 0.2         | 102        | 0.2                     | 97          | 0.55    | 194                                    | 0.05159                                | 0.71     | 0.2896                                | 0.76     | 0.040713                              | 0.09     | .51 | 257.25                                          | 0.24      | 267                                              | 16.4      |
| 2                                                                        | 0.4         | 197        | 0.4                     | 91          | 0.64    | 474                                    | 0.05107                                | 1.12     | 0.2868                                | 1.20     | 0.040732                              | 0.11     | .71 | 257.37                                          | 0.29      | 244                                              | 25.9      |
| 3                                                                        | 0.3         | 262        | 0.4                     | 90          | 0.64    | 477                                    | 0.05102                                | 1.12     | 0.2866                                | 1.19     | 0.040736                              | 0.11     | .70 | 257.39                                          | 0.29      | 242                                              | 25.7      |
| 4                                                                        | 0.1         | 210        | 0.3                     | 92          | 0.68    | 171                                    | 0.05148                                | 0.84     | 0.2889                                | 0.90     | 0.040703                              | 0.10     | .58 | 257.19                                          | 0.25      | 262                                              | 19.4      |
| 5                                                                        | 0.2         | 65         | 0.3                     | 91          | 0.76    | 222                                    | 0.05741                                | 0.57     | 0.6591                                | 0.61     | 0.083270                              | 0.10     | .48 | 515.61                                          | 0.50      | 507                                              | 12.5      |
| <b>PSP-29: 1 zircon per fraction (21° 52' 28.8" N, 103° 53' 45.6" E)</b> |             |            |                         |             |         |                                        |                                        |          |                                       |          |                                       |          |     |                                                 |           |                                                  |           |
| 1                                                                        | 0.2         | 47         | 0.6                     | 41          | 0.52    | 54                                     | 0.05137                                | 2.68     | 0.2885                                | 2.85     | 0.04073                               | 0.26     | .66 | 257.4                                           | 0.7       | 257.3                                            | 61.6      |
| 2                                                                        | 0.4         | 173        | 2.6                     | 55          | 0.87    | 84                                     | 0.05199                                | 1.68     | 0.2921                                | 1.78     | 0.04075                               | 0.12     | .85 | 257.5                                           | 0.3       | 284.9                                            | 38.4      |
| 3                                                                        | 0.3         | 36         | 0.5                     | 53          | 1.02    | 66                                     | 0.05106                                | 2.61     | 0.2873                                | 2.77     | 0.04081                               | 0.24     | .69 | 257.9                                           | 0.6       | 243.6                                            | 60.1      |
| 4                                                                        | 0.4         | 235        | 0.4                     | 91          | 1.00    | 468                                    | 0.05142                                | 0.26     | 0.2896                                | 0.28     | 0.04084                               | 0.06     | .40 | 258.0                                           | 0.2       | 259.7                                            | 5.9       |
| 5                                                                        | 0.2         | 42         | 0.3                     | 52          | 0.64    | 66                                     | 0.05168                                | 1.85     | 0.2912                                | 1.97     | 0.04087                               | 0.25     | .53 | 258.2                                           | 0.7       | 271.4                                            | 42.5      |
| 6                                                                        | 0.2         | 57         | 0.4                     | 55          | 0.84    | 73                                     | 0.05187                                | 1.99     | 0.2927                                | 2.11     | 0.04092                               | 0.21     | .63 | 258.5                                           | 0.5       | 279.7                                            | 45.5      |
| <b>PSP-24: 1 zircon per fraction (22° 2' 24.2" N, 103° 57' 9.2" E)</b>   |             |            |                         |             |         |                                        |                                        |          |                                       |          |                                       |          |     |                                                 |           |                                                  |           |
| 1                                                                        | 0.2         | 132        | 0.2                     | 87          | 0.43    | 91                                     | 0.05204                                | 8.96     | 0.2919                                | 9.57     | 0.040678                              | 0.63     | .97 | 257.03                                          | 1.62      | 287                                              | 204.8     |
| 2                                                                        | 0.2         | 122        | 0.2                     | 77          | 0.41    | 57                                     | 0.05008                                | 10.9     | 0.2802                                | 11.58    | 0.040570                              | 0.74     | .96 | 256.37                                          | 1.90      | 199                                              | 252.5     |
| 3                                                                        | 0.2         | 142        | 0.3                     | 84          | 0.49    | 80                                     | 0.05155                                | 5.98     | 0.2898                                | 6.39     | 0.040759                              | 0.45     | .91 | 257.53                                          | 1.15      | 266                                              | 137.3     |
| 4                                                                        | 0.3         | 146        | 0.2                     | 98          | 0.74    | 166                                    | 0.05189                                | 5.69     | 0.2908                                | 6.08     | 0.040646                              | 0.42     | .93 | 256.84                                          | 1.07      | 281                                              | 130.2     |
| 5                                                                        | 0.3         | 124        | 0.2                     | 87          | 0.58    | 84                                     | 0.05095                                | 7.54     | 0.2860                                | 8.04     | 0.040703                              | 0.51     | .97 | 257.19                                          | 1.32      | 239                                              | 173.9     |
| <b>PSP-31: 1 zircon per fraction (22° 18' 12.2" N, 103° 46' 31.1" E)</b> |             |            |                         |             |         |                                        |                                        |          |                                       |          |                                       |          |     |                                                 |           |                                                  |           |
| 1                                                                        | 0.2         | 189        | 0.4                     | 93          | 0.65    | 114                                    | 0.05349                                | 6.60     | 0.2997                                | 7.07     | 0.040640                              | 0.47     | .98 | 256.80                                          | 1.22      | 350                                              | 149.3     |
| 2                                                                        | 0.2         | 180        | 0.2                     | 99          | 0.74    | 212                                    | 0.05155                                | 3.62     | 0.2880                                | 3.87     | 0.040515                              | 0.26     | .94 | 256.02                                          | 0.67      | 266                                              | 83.1      |
| 3                                                                        | 0.4         | 178        | 0.3                     | 98          | 0.48    | 282                                    | 0.05124                                | 2.95     | 0.2865                                | 3.15     | 0.040555                              | 0.24     | .84 | 256.27                                          | 0.61      | 252                                              | 68.0      |
| 4                                                                        | 0.3         | 155        | 0.3                     | 93          | 0.40    | 144                                    | 0.05031                                | 6.88     | 0.2819                                | 7.33     | 0.040629                              | 0.46     | .98 | 256.73                                          | 1.18      | 209                                              | 159.4     |
| 5                                                                        | 0.2         | 136        | 0.2                     | 87          | 0.58    | 84                                     | 0.05089                                | 7.55     | 0.2851                                | 8.04     | 0.040587                              | 0.51     | .97 | 256.47                                          | 1.32      | 236                                              | 174.2     |

U-Pb isotopic data for zircons from samples from Vietnamese granites.

Sample weights are calculated from crystal dimensions and are associated with as much as 50% uncertainty (estimated)

Pb<sub>c</sub> = Total common Pb including analytical blank ( $0.8 \pm 0.3$  pg per analysis). Blank composition is:  $^{206}\text{Pb}/^{204}\text{Pb} = 18.55 \pm 0.63$ ,  $^{207}\text{Pb}/^{204}\text{Pb} = 15.50 \pm 0.55$ ,  $^{208}\text{Pb}/^{204}\text{Pb} = 38.07 \pm 1.56$  (all  $2\sigma$ ), and a  $^{206}\text{Pb}/^{204}\text{Pb} - ^{207}\text{Pb}/^{204}\text{Pb}$  correlation of 0.9.

Th/U calculated from radiogenic  $^{208}\text{Pb}/^{206}\text{Pb}$  and age.

Measured isotopic ratios corrected for tracer contribution and mass fractionation ( $0.04 \pm 0.09$  ‰/amu).

$\rho$  = error correlation coefficient of radiogenic  $^{207}\text{Pb}/^{235}\text{U}$  vs.  $^{206}\text{Pb}/^{238}\text{U}$ .

All uncertainties given at  $2\sigma$
